# Supplementary material for: Risk of Global External Cereals Supply under the Background of the COVID-19 Pandemic: Based on the Perspective of Trade Network
Source: MDPI journal article supplement (doi:10.3390/foods10061168), 2021-05-23
Supplement: s1 [file s1]

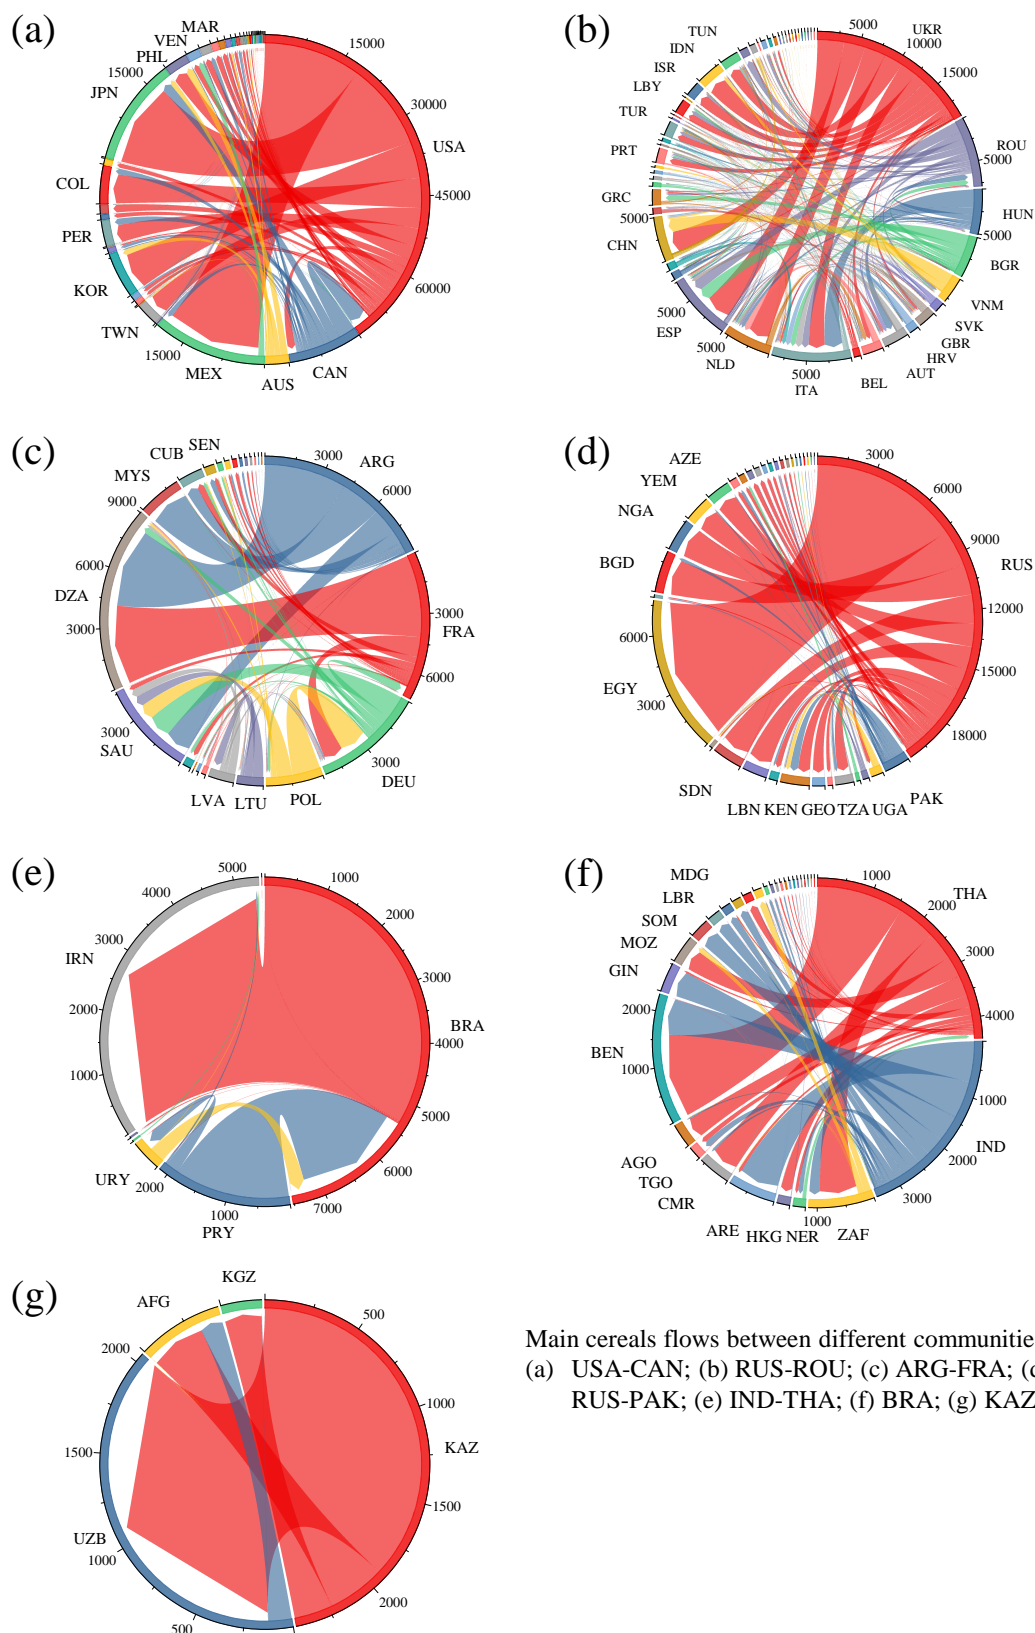

Main cereals flows between different communities:  
(a) USA-CAN; (b) RUS-ROU; (c) ARG-FRA; (d) RUS-PAK; (e) IND-THA; (f) BRA; (g) KAZ.

**Figure S1 Flow of the main cereals within the global CTN communities.** A total of 218 countries are ranked according to the total trade quantity and plotted clockwise in descending order. The size of the out bar indicates the total trade quantity (unit: 1000t). Export quantity is indicated with links emanating from the outer bar of the same color.

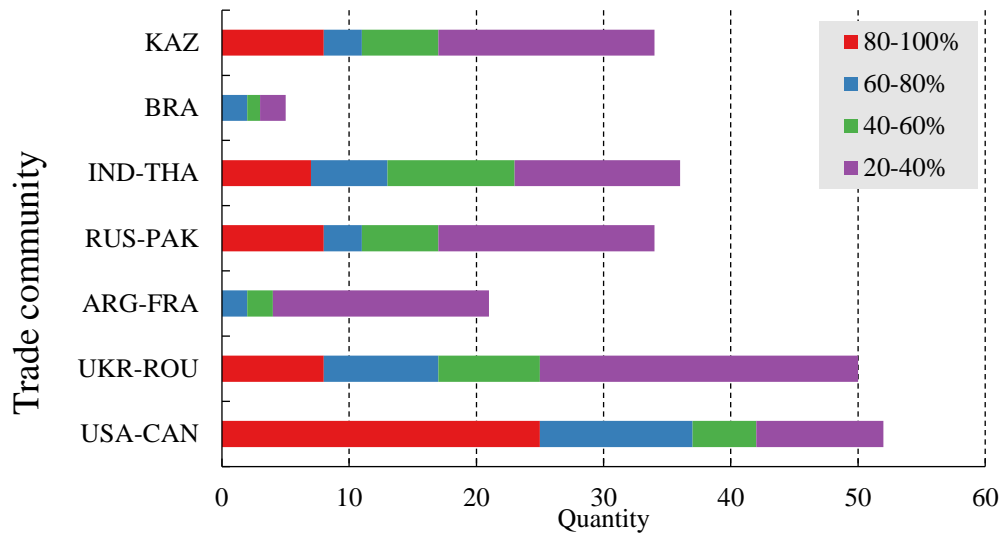

Figure S2 Statistics on the level of dependence on a single country in different communities.

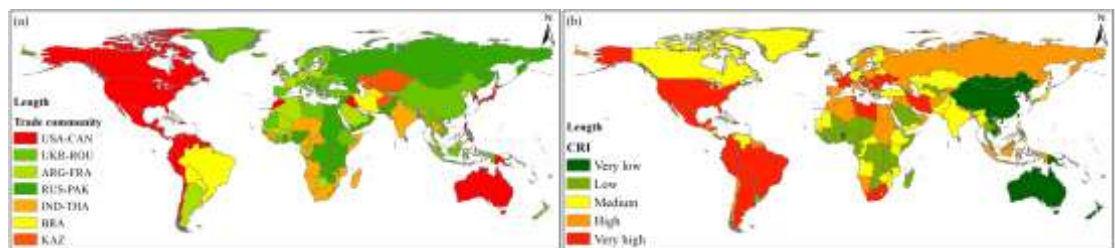

Figure S3 Spatial pattern of (a) trade community of cereals trade networks (CTN) and (b) the COVID-19 Risk Index (CRI)

Table S1 Country (218 in total) name and ISO3 code

| SN | ISO3 | Country                | SN | ISO3 | Country                          | SN | ISO3 | Country                         |
|----|------|------------------------|----|------|----------------------------------|----|------|---------------------------------|
| 1  | ABW  | Aruba                  | 25 | BLR  | Belarus                          | 49 | CXR  | Christmas Island                |
| 2  | AFG  | Afghanistan            | 26 | BLZ  | Belize                           | 50 | CYM  | Cayman Islands                  |
| 3  | AGO  | Angola                 | 27 | BMU  | Bermuda                          | 51 | CYP  | Cyprus                          |
| 4  | AIA  | Anguilla               | 28 | BOL  | Bolivia                          | 52 | CZE  | Czech Republic                  |
| 5  | ALB  | Albania                | 29 | BRA  | Brazil                           | 53 | DEU  | Germany                         |
| 6  | AND  | Andorra                | 30 | BRB  | Barbados                         | 54 | DJI  | Djibouti                        |
| 7  | ANT  | Netherlands Antilles   | 31 | BRN  | Brunei Darussalam                | 55 | DMA  | Dominica                        |
| 8  | ARE  | United Arab Emirates   | 32 | BTN  | Bhutan                           | 56 | DNK  | Denmark                         |
| 9  | ARG  | Argentina              | 33 | BWA  | Botswana                         | 57 | DOM  | Dominican Republic              |
| 10 | ARM  | Armenia                | 34 | CAF  | Central African Republic         | 58 | DZA  | Algeria                         |
| 11 | ASM  | American Samoa         | 35 | CAN  | Canada                           | 59 | ECU  | Ecuador                         |
| 12 | ATG  | Antigua and Barbuda    | 36 | CHE  | Switzerland                      | 60 | EGY  | Egypt                           |
| 13 | AUS  | Australia              | 37 | CHL  | Chile                            | 61 | ERI  | Eritrea                         |
| 14 | AUT  | Austria                | 38 | CHN  | China                            | 62 | ESP  | Spain                           |
| 15 | AZE  | Azerbaijan             | 39 | CIV  | Cote d'Ivoire                    | 63 | EST  | Estonia                         |
| 16 | BDI  | Burundi                | 40 | CMR  | Cameroon                         | 64 | ETH  | Ethiopia                        |
| 17 | BEL  | Belgium                | 41 | COD  | Democratic Republic of the Congo | 65 | FIN  | Finland                         |
| 18 | BEN  | Benin                  | 42 | COG  | Congo                            | 66 | FJI  | Fiji                            |
| 19 | BFA  | Burkina Faso           | 43 | COK  | Cook Islands                     | 67 | FLK  | Falkland Islands (Malvinas)     |
| 20 | BGD  | Bangladesh             | 44 | COL  | Colombia                         | 68 | FRA  | France                          |
| 21 | BGR  | Bulgaria               | 45 | COM  | Comoros                          | 69 | FRO  | Faroe Islands                   |
| 22 | BHR  | Bahrain                | 46 | CPV  | Cape Verde                       | 70 | FSM  | Micronesia, Federated States of |
| 23 | BHS  | Bahamas                | 47 | CRI  | Costa Rica                       | 71 | GAB  | Gabon                           |
| 24 | BIH  | Bosnia and Herzegovina | 48 | CUB  | Cuba                             | 72 | GBR  | United Kingdom                  |

| SN | ISO3 | Country                    | SN  | ISO3 | Country                          | SN  | ISO3 | Country                         |
|----|------|----------------------------|-----|------|----------------------------------|-----|------|---------------------------------|
| 73 | GEO  | Georgia                    | 98  | JAM  | Jamaica                          | 123 | MDV  | Maldives                        |
| 74 | GHA  | Ghana                      | 99  | JOR  | Jordan                           | 124 | MEX  | Mexico                          |
| 75 | GIN  | Guinea                     | 100 | JPN  | Japan                            | 125 | MHL  | Marshall Islands                |
| 76 | GMB  | Gambia                     | 101 | KAZ  | Kazakhstan                       | 126 | MKD  | The Republic of North Macedonia |
| 77 | GNB  | Guinea-Bissau              | 102 | KEN  | Kenya                            | 127 | MLI  | Mali                            |
| 78 | GNQ  | Equatorial Guinea          | 103 | KGZ  | Kyrgyzstan                       | 128 | MLT  | Malta                           |
| 79 | GRC  | Greece                     | 104 | KHM  | Cambodia                         | 129 | MMR  | Burma                           |
| 80 | GRD  | Grenada                    | 105 | KIR  | Kiribati                         | 130 | MNE  | Montenegro                      |
| 81 | GRL  | Greenland                  | 106 | KNA  | Saint Kitts and Nevis            | 131 | MNG  | Mongolia                        |
| 82 | GTM  | Guatemala                  | 107 | KOR  | Korea, Republic of               | 132 | MNP  | Northern Mariana Islands        |
| 83 | GUM  | Guam                       | 108 | KWT  | Kuwait                           | 133 | MOZ  | Mozambique                      |
| 84 | GUY  | Guyana                     | 109 | LAO  | Lao People's Democratic Republic | 134 | MRT  | Mauritania                      |
| 85 | HKG  | Hong Kong                  | 110 | LBN  | Lebanon                          | 135 | MSR  | Montserrat                      |
| 86 | HND  | Honduras                   | 111 | LBR  | Liberia                          | 136 | MUS  | Mauritius                       |
| 87 | HRV  | Croatia                    | 112 | LBY  | Libyan Arab Jamahiriya           | 137 | MWI  | Malawi                          |
| 88 | HTI  | Haiti                      | 113 | LCA  | Saint Lucia                      | 138 | MYS  | Malaysia                        |
| 89 | HUN  | Hungary                    | 114 | LKA  | Sri Lanka                        | 139 | NAM  | Namibia                         |
| 90 | IDN  | Indonesia                  | 115 | LSO  | Lesotho                          | 140 | NCL  | New Caledonia                   |
| 91 | IND  | India                      | 116 | LTU  | Lithuania                        | 141 | NER  | Niger                           |
| 92 | IRL  | Ireland                    | 117 | LUX  | Luxembourg                       | 142 | NFK  | Norfolk Island                  |
| 93 | IRN  | Iran (Islamic Republic of) | 118 | LVA  | Latvia                           | 143 | NGA  | Nigeria                         |
| 94 | IRQ  | Iraq                       | 119 | MAC  | Macau                            | 144 | NIC  | Nicaragua                       |
| 95 | ISL  | Iceland                    | 120 | MAR  | Morocco                          | 145 | NIU  | Niue                            |
| 96 | ISR  | Israel                     | 121 | MDA  | Republic of Moldova              | 146 | NLD  | Netherlands                     |
| 97 | ITA  | Italy                      | 122 | MDG  | Madagascar                       | 147 | NOR  | Norway                          |

| SN  | ISO3 | Country                                | SN  | ISO3 | Country                   | SN  | ISO3 | Country                          |
|-----|------|----------------------------------------|-----|------|---------------------------|-----|------|----------------------------------|
| 148 | NPL  | Nepal                                  | 173 | SLB  | Solomon Islands           | 171 | SGP  | Singapore                        |
| 149 | NRU  | Nauru                                  | 174 | SLE  | Sierra Leone              | 172 | SHN  | Saint Helena                     |
| 150 | NZL  | New Zealand                            | 175 | SLV  | El Salvador               | 198 | TUR  | Turkey                           |
| 151 | OMN  | Oman                                   | 176 | SOM  | Somalia                   | 199 | TUV  | Tuvalu                           |
| 152 | PAK  | Pakistan                               | 177 | SPM  | Saint Pierre and Miquelon | 200 | TWN  | Taiwan                           |
| 153 | PAN  | Panama                                 | 178 | SRB  | Serbia                    | 201 | TZA  | United Republic of Tanzania      |
| 154 | PER  | Peru                                   | 179 | SSD  | South Sudan               | 202 | UGA  | Uganda                           |
| 155 | PHL  | Philippines                            | 180 | STP  | Sao Tome and Principe     | 203 | UKR  | Ukraine                          |
| 156 | PLW  | Palau                                  | 181 | SUR  | Suriname                  | 204 | URY  | Uruguay                          |
| 157 | PNG  | Papua New Guinea                       | 182 | SVK  | Slovakia                  | 205 | USA  | The United States                |
| 158 | POL  | Poland                                 | 183 | SVN  | Slovenia                  | 206 | UZB  | Uzbekistan                       |
| 159 | PRK  | Korea, Democratic People's Republic of | 184 | SWE  | Sweden                    | 207 | VAT  | Holy See (Vatican City)          |
| 160 | PRT  | Portugal                               | 185 | SWZ  | Swaziland                 | 208 | VCT  | Saint Vincent and the Grenadines |
| 161 | PRY  | Paraguay                               | 186 | SYC  | Seychelles                | 209 | VEN  | Venezuela                        |
| 162 | PSE  | Palestine                              | 187 | SYR  | Syrian Arab Republic      | 210 | VGB  | British Virgin Islands           |
| 163 | PYF  | French Polynesia                       | 188 | TCA  | Turks and Caicos Islands  | 211 | VNM  | Viet Nam                         |
| 164 | QAT  | Qatar                                  | 189 | TCD  | Chad                      | 212 | VUT  | Vanuatu                          |
| 165 | ROU  | Romania                                | 190 | TGO  | Togo                      | 213 | WLF  | Wallis and Futuna Islands        |
| 166 | RUS  | Russia                                 | 191 | THA  | Thailand                  | 214 | WSM  | Samoa                            |
| 167 | RWA  | Rwanda                                 | 192 | TJK  | Tajikistan                | 215 | YEM  | Yemen                            |
| 168 | SAU  | Saudi Arabia                           | 193 | TKM  | Turkmenistan              | 216 | ZAF  | South Africa                     |
| 169 | SDN  | Sudan                                  | 194 | TLS  | Timor-Leste               | 217 | ZMB  | Zambia                           |
| 170 | SEN  | Senegal                                | 195 | TON  | Tonga                     | 218 | ZWE  | Zimbabwe                         |

Note: SN is abbreviation of serial number.
